# Supplementary material for: Changes in blood lipid levels and influencing factors among treatment-naïve adult male HIV/AIDS patients following BIC/FTC/TAF vs. 3TC+EFV+TDF
Source: PubMed Central journal article supplement — Chin Med J (Engl). 2024 May 30;137(12):1447–52. doi: 10.1097/CM9.0000000000003147 (PMC11188908; doi:10.1097/cm9.0000000000003147), 2024-05-30
Supplement: cm9-137-1447-s001.pdf [file cm9-137-1447-s001.pdf]

**Supplementary Table 1: Demographical and clinical characteristics of the study subjects by BIC/FTC/TAF and 3TC + EFV + TDF groups.**

| <b>Characteristic</b>        | <b>Total<br/>N = 870</b> | <b>BIC/FTC/TAF (N = 510)</b> | <b>3TC + EFV + TDF (N = 360)</b> | $\chi^2/t$ | <b>P-value</b>      |
|------------------------------|--------------------------|------------------------------|----------------------------------|------------|---------------------|
| Age                          | 32.8 (27.0, 41.2)        | 32.0 (27.3, 38.8)            | 34.0 (26.0, 46.0)                | 1.843      | 0.066*              |
| 18–27 years                  | 214 (24.6)               | 119 (23.3)                   | 95 (26.4)                        | 26.519     | <0.001 <sup>†</sup> |
| 27–32 years                  | 191 (22.0)               | 134 (26.3)                   | 58 (16.1)                        |            |                     |
| 32–41 years                  | 237 (27.2)               | 151 (29.6)                   | 86 (23.9)                        |            |                     |
| ≥41 years                    | 227 (26.1)               | 106 (20.8)                   | 121 (33.6)                       |            |                     |
| Nationality                  |                          |                              |                                  | 0.330      | 0.566 <sup>†</sup>  |
| Han                          | 803 (92.3)               | 468 (91.8)                   | 335 (93.1)                       |            |                     |
| Others                       | 67 (7.7)                 | 42 (8.2)                     | 25 (6.9)                         |            |                     |
| Education                    |                          |                              |                                  | 121.160    | <0.001 <sup>†</sup> |
| High school and below        | 325 (37.4)               | 116 (22.7)                   | 209 (58.1)                       |            |                     |
| Bachelor’s degree or college | 473 (54.4)               | 330 (64.7)                   | 143 (39.7)                       |            |                     |

|                                    |                   |                      |                    |        |                     |
|------------------------------------|-------------------|----------------------|--------------------|--------|---------------------|
| Master and above                   | 71 (8.2)          | 63 (12.4)            | 8 (2.2)            |        |                     |
| BMI (kg/m <sup>2</sup> )           | 22.5 (20.3, 25.0) | 22.6 (20.6, 25.2)    | 22.4 (20.2, 24.7)  | 0.403  | 0.687*              |
| Lean                               | 64 (7.4)          | 32 (6.3)             | 32 (8.9)           | 3.094  | 0.377 <sup>†</sup>  |
| Normal                             | 495 (56.9)        | 297 (58.2)           | 198 (55)           |        |                     |
| Overweight                         | 222 (25.5)        | 128 (25.1)           | 94 (26.1)          |        |                     |
| Obesity                            | 84 (9.7)          | 53 (10.4)            | 31 (8.6)           |        |                     |
| Marital status                     |                   |                      |                    | 23.274 | <0.001 <sup>†</sup> |
| Unmarried                          | 551 (63.3)        | 355 (69.6)           | 196 (54.4)         |        |                     |
| Married                            | 252 (29)          | 117 (22.9)           | 135 (37.5)         |        |                     |
| Divorced or widowed                | 66 (7.6)          | 37 (7.3)             | 29 (8.1)           |        |                     |
| Baseline CD4 cell count (cells/μL) | 322 (206, 452.8)  | 311.3 (183.9, 443.8) | 350 (233.9, 463.6) | 2.285  | 0.023*              |
| <200                               | 213 (24.5)        | 143 (28.0)           | 70 (19.4)          | 7.973  | 0.005 <sup>†</sup>  |
| ≥200                               | 657 (75.5)        | 367 (72.0)           | 290 (80.6)         |        |                     |
| Baseline CD8 cell count (cells/μL) |                   |                      |                    | 0.319  | 0.853 <sup>†</sup>  |
| <500                               | 141 (16.2)        | 82 (16.1)            | 59 (16.4)          |        |                     |

|                              |                       |                             |                           |       |                     |
|------------------------------|-----------------------|-----------------------------|---------------------------|-------|---------------------|
| 500–999                      | 352 (40.5)            | 203 (39.8)                  | 149 (41.4)                |       |                     |
| ≥1000                        | 377 (43.3)            | 225 (44.1)                  | 152 (42.2)                |       |                     |
| Baseline CD4/CD8 ratio       |                       |                             |                           | 0.119 | 0.730 <sup>†</sup>  |
| <1.0                         | 840 (96.6)            | 491 (96.3)                  | 349 (96.9)                |       |                     |
| ≥1.0                         | 30 (3.4)              | 19 (3.7)                    | 11 (3.1)                  |       |                     |
| Baseline HIV RNA (copies/mL) | 22,347 (5775, 77,567) | 25,876.5 (6884.5, 96,913.3) | 18,815 (5083.8, 54,665.5) | 3.514 | <0.001 <sup>*</sup> |
| <100,000                     | 690 (79.3)            | 386 (75.7)                  | 304 (84.4)                | 9.339 | 0.002 <sup>†</sup>  |
| ≥100,000                     | 180 (20.7)            | 124 (24.3)                  | 56 (15.6)                 |       |                     |
| Diabetes history             |                       |                             |                           | 3.988 | 0.263 <sup>†</sup>  |
| Yes                          | 16 (1.8)              | 12 (2.4)                    | 4 (1.1)                   |       |                     |
| No                           | 842 (96.8)            | 488 (95.7)                  | 354 (98.3)                |       |                     |
| Cigarette smoking            |                       |                             |                           | 8.578 | 0.003 <sup>†</sup>  |
| Yes                          | 302 (34.7)            | 155 (30.4)                  | 147 (40.8)                |       |                     |
| No                           | 559 (64.3)            | 346 (67.8)                  | 213 (59.2)                |       |                     |
| Alcohol drinking             |                       |                             |                           | 0.652 | 0.419 <sup>†</sup>  |

|     |          |            |            |
|-----|----------|------------|------------|
| Yes | 261 (30) | 146 (28.6) | 115 (31.9) |
| No  | 600 (69) | 355 (69.6) | 245 (68.1) |

Data are presented as median (IQR), n (%).

3TC + EFV + TDF: Lamivudine, efavirenz, and tenofovir disoproxil fumarate; BIC/FTC/TAF: Bictegravir, emtricitabine, and tenofovir alafenamide; BMI: Body Mass Index; HIV: Human immunodeficiency virus; IQR: Interquartile range.

\**P*-values were from the Wilcoxon rank-sum test to compare the two groups.

†*P*-values were from the chi-squared test to compare the two groups.

**Supplementary Table 2: Blood dyslipidemia (LDL-C increasing) and their univariate analysis among naive treated male adult HIV/AIDS patients.**

| Variables   | LDL-C increasing |            | Follow-up time/person weeks | Incidence/100 person weeks | HR (95% CI) | <i>P</i> -value |
|-------------|------------------|------------|-----------------------------|----------------------------|-------------|-----------------|
|             | Yes (%)          | No (%)     |                             |                            |             |                 |
| Total       | 19 (2.2)         | 851 (97.8) | 26,906.92                   | 0.07                       |             |                 |
| Nationality |                  |            |                             |                            |             |                 |
| Han         | 16 (84.2)        | 787 (92.5) | 24,740.34                   | 0.06                       | 1.00        |                 |

|                               |           |            |           |      |                  |       |
|-------------------------------|-----------|------------|-----------|------|------------------|-------|
| Others                        | 3 (15.8)  | 64 (7.5)   | 2166.58   | 0.14 | 0.86 (0.69–1.07) | 0.170 |
| <b>Age (years)</b>            |           |            |           |      |                  |       |
| 18–27                         | 1 (5.3)   | 213 (25)   | 6668.05   | 0.01 | 1.00             |       |
| 27–32                         | 4 (21.1)  | 188 (22.1) | 5948.39   | 0.07 | 0.97 (0.83–1.14) | 0.735 |
| 32–41                         | 11 (57.9) | 226 (26.6) | 7600.92   | 0.14 | 0.87 (0.74–1.01) | 0.083 |
| ≥41                           | 3 (15.8)  | 224 (26.3) | 6698.56   | 0.04 | 1.01 (0.86–1.19) | 0.861 |
| <b>Education</b>              |           |            |           |      |                  |       |
| High school and below         | 5 (26.3)  | 320 (37.6) | 10,059.10 | 0.05 | 1.00             |       |
| Bachelor's degree or college  | 11 (57.9) | 462 (54.3) | 14,698.78 | 0.07 | 1.01 (0.89–1.14) | 0.860 |
| Master and above              | 3 (15.8)  | 68 (8)     | 2117.75   | 0.14 | 1.10 (0.86–1.41) | 0.447 |
| <b>BMI (kg/m<sup>2</sup>)</b> |           |            |           |      |                  |       |
| Lean                          | 0 (0)     | 64 (7.5)   | 2010.33   | 0    | 1.00             |       |
| Normal                        | 12 (63.2) | 483 (56.8) | 14,876.40 | 0.08 | 1.01 (0.82–1.25) | 0.911 |
| Overweight                    | 5 (26.3)  | 217 (25.5) | 7135.20   | 0.07 | 0.90 (0.72–1.13) | 0.357 |

|                                          |           |            |           |      |                  |       |
|------------------------------------------|-----------|------------|-----------|------|------------------|-------|
| Obesity                                  | 2 (10.5)  | 82 (9.6)   | 2644.99   | 0.08 | 0.93 (0.71–1.23) | 0.624 |
| Marital status                           |           |            |           |      |                  |       |
| Unmarried                                | 11 (57.9) | 540 (63.5) | 16,888.68 | 0.07 | 1.00             |       |
| Married                                  | 6 (31.6)  | 246 (28.9) | 7770.02   | 0.08 | 0.95 (0.83–1.08) | 0.448 |
| Divorced or widowed                      | 2 (10.5)  | 64 (7.5)   | 2214.93   | 0.09 | 0.80 (0.63–1.01) | 0.060 |
| Diabetes history                         |           |            |           |      |                  |       |
| Yes                                      | 0 (0)     | 16 (1.9)   | 535.89    | 0    | 1.00             |       |
| No                                       | 18 (94.7) | 824 (96.8) | 26,012.02 | 0.07 | 0.97 (0.59–1.59) | 0.894 |
| Smoke                                    |           |            |           |      |                  |       |
| Yes                                      | 8 (42.1)  | 294 (34.5) | 9693.70   | 0.08 | 1.00             |       |
| No                                       | 10 (52.6) | 549 (64.5) | 16,976.07 | 0.06 | 1.14 (0.99–1.31) | 0.069 |
| Alcohol drinking                         |           |            |           |      |                  |       |
| Yes                                      | 6 (31.6)  | 255 (30)   | 8212.34   | 0.07 | 1.00             |       |
| No                                       | 12 (63.2) | 588 (69.1) | 18,457.43 | 0.07 | 1.02 (0.90–1.16) | 0.757 |
| Baseline CD4 cell count (cells/ $\mu$ L) |           |            |           |      |                  |       |

|                                    |            |            |           |      |                  |        |
|------------------------------------|------------|------------|-----------|------|------------------|--------|
| <200                               | 3 (15.8)   | 210 (24.7) | 5965.00   | 0.05 | 1.00             |        |
| ≥200                               | 16 (84.2)  | 641 (75.3) | 20,941.92 | 0.08 | 1.28 (0.37–4.31) | 0.696  |
| Baseline CD8 cell count (cells/μL) |            |            |           |      |                  |        |
| <500                               | 0 (0)      | 141 (16.6) | 3537.66   | 0    | 1.00             |        |
| 500–999                            | 10 (52.6)  | 342 (40.2) | 10,821.83 | 0.09 | 0.69 (0.57–0.84) | <0.001 |
| ≥1000                              | 9 (47.4)   | 368 (43.2) | 12,547.43 | 0.07 | 0.64 (0.54–0.77) | <0.001 |
| Baseline CD4/CD8                   |            |            |           |      |                  |        |
| <1.0                               | 19 (100.0) | 821 (96.5) | 26,089.93 | 0.07 | 1.00             |        |
| ≥1.0                               | 0 (0)      | 30 (3.5)   | 816.99    | 0    | 1.17 (0.83–1.63) | 0.369  |
| Baseline HIV RNA (copies/mL)       |            |            |           |      |                  |        |
| <100,000                           | 16 (84.2)  | 674 (79.2) | 22,058.20 | 0.07 | 1.00             |        |
| ≥100,000                           | 3 (15.8)   | 177 (20.8) | 4848.72   | 0.06 | 1.26 (1.07–1.48) | 0.005  |
| Regime                             |            |            |           |      |                  |        |
| BIC/FTC/TAF                        | 14 (73.7)  | 496 (58.3) | 15,220.92 | 0.09 | 1.00             |        |

---

|                 |          |            |           |      |                  |       |
|-----------------|----------|------------|-----------|------|------------------|-------|
| 3TC + EFV + TDF | 5 (26.3) | 355 (41.7) | 11,686.00 | 0.04 | 0.80 (0.71–1.30) | 0.890 |
|-----------------|----------|------------|-----------|------|------------------|-------|

---

3TC + EFV + TDF: Lamivudine, efavirenz, and tenofovir disoproxil fumarate; BIC/FTC/TAF: Bictegravir, emtricitabine, and tenofovir alafenamide; BMI: Body Mass Index; HIV/AIDS: Human immunodeficiency virus/acquired immunodeficiency syndrome; HR: Hazard Ratio; LDL-C: Low-density lipoprotein cholesterol.
